# Supplementary material
Source: PubMed Central journal article supplement (PMC6750977)
Supplement: NIHMS1536640-supplement-1.pdf [file NIHMS1536640-supplement-1.pdf]

Supplemental Table 2. Cosinor analyses of cFOS expression in constant darkness

(Circadian Time) and in a 12:12 LD cycle (Zeitgeber Time). Mesor and amplitude are presented as relative expressions, phase angle is presented in radians. All means are presented +/- SEMs. Bolded values are significant with  $p < 0.05$ .

| i) Circadian Time  |                   |                  |                  |                                               |  |
|--------------------|-------------------|------------------|------------------|-----------------------------------------------|--|
| a) SD rat          |                   |                  |                  |                                               |  |
|                    | Mesor             | Amplitude        | Phase Angle      | Cosinor Analysis                              |  |
| <i>dLGN</i>        | 29.08±2.48        | 4.07±1.53        | 1.57±0.25        | F(2,28) = 0.74, $p = 0.49$                    |  |
| <i>IGL</i>         | 8.36±1.00         | 1.09±0.15        | 1.25±0.23        | F(2,28) = 0.27, $p = 0.76$                    |  |
| <i>vLGN</i>        | 10.82±1.99        | 5.13±0.01        | 0.80±0.38        | F(2,28) = 1.52, $p = 0.24$                    |  |
| <i>OPN</i>         | 4.48±1.06         | 3.08±0.88        | 1.56±0.36        | F(2,27) = 2.10, $p = 0.14$                    |  |
| <i>LHb</i>         | 14.77±1.81        | 3.75±0.35        | 0.36±0.35        | F(2,28) = 1.03, $p = 0.37$                    |  |
| <i>MHb</i>         | 8.72±2.07         | 1.98±0.98        | 1.29±0.06        | F(2,28) = 0.30, $p = 0.75$                    |  |
| <i>SC</i>          | 14.22±1.80        | 1.28±0.58        | 1.47±0.09        | F(2,28) = 0.02, $p = 0.99$                    |  |
| b) Grass Rat       |                   |                  |                  |                                               |  |
| <i>dLGN</i>        | 24.63±3.47        | 8.91±1.75        | 1.57±0.36        | F(2,32) = 1.51, $p = 0.24$                    |  |
| <i>IGL</i>         | <b>11.11±1.24</b> | <b>6.31±0.46</b> | <b>1.28±0.37</b> | <b>F(2,31) = 6.19, <math>p = 0.01</math></b>  |  |
| <i>vLGN</i>        | 2.68±0.836        | 1.75±0.17        | 0.41±0.35        | F(2,31) = 0.93, $p = 0.40$                    |  |
| <i>OPN</i>         | 6.29±1.21         | 1.70±0.47        | 0.05±0.26        | F(2,31) = 0.52, $p = 0.60$                    |  |
| <i>LHb</i>         | 16.72±1.99        | 0.99±0.40        | 1.55±0.08        | F(2,31) = 0.08, $p = 0.93$                    |  |
| <i>MHb</i>         | 2.75±0.71         | 2.18±0.53        | 1.55±0.36        | F(2,31) = 2.62, $p = 0.09$                    |  |
| <i>SC</i>          | 2.38±0.50         | 1.12±0.39        | 1.57±0.32        | F(2,31) = 1.43, $p = 0.26$                    |  |
| ii) Zeitgeber Time |                   |                  |                  |                                               |  |
| a) SD rat          |                   |                  |                  |                                               |  |
|                    | Mesor             | Amplitude        | Phase Angle      | Cosinor Analysis                              |  |
| <i>dLGN</i>        | 38.70±4.47        | 10.68±1.49       | 1.29±0.37        | F(2,29) = 1.24, $p = 0.30$                    |  |
| <i>IGL</i>         | <b>23.97±1.76</b> | <b>9.70±0.80</b> | <b>1.24±0.37</b> | <b>F(2,29) = 6.91, <math>p = 0.004</math></b> |  |
| <i>vLGN</i>        | 14.35±3.23        | 2.79±1.42        | 0.69±0.17        | F(2,29) = 0.26, $p = 0.77$                    |  |
| <i>OPN</i>         | 18.81±2.82        | 5.19±1.29        | 1.51±0.35        | F(2,29) = 0.88, $p = 0.43$                    |  |
| <i>LHb</i>         | 17.17±2.09        | 2.13±0.86        | 0.03±0.15        | F(2,29) = 0.33, $p = 0.72$                    |  |
| <i>MHb</i>         | 6.46±0.71         | 1.02±0.41        | 1.55±0.21        | F(2,29) = 0.59, $p = 0.56$                    |  |
| <i>SC</i>          | 15.11±2.04        | 0.49±0.16        | 0.001±0.05       | F(2,29) = 0.15, $p = 0.86$                    |  |
| b) Grass Rat       |                   |                  |                  |                                               |  |
| <i>dLGN</i>        | 28.76±3.34        | 8.82±4.40        | 1.04±0.17        | F(2,30) = 1.17, $p = 0.32$                    |  |
| <i>IGL</i>         | 15.19±1.32        | 2.69±0.78        | 0.01±0.31        | F(2,33) = 1.19, $p = 0.32$                    |  |
| <i>vLGN</i>        | 4.73±1.22         | 2.08±1.06        | 0.94±0.03        | F(2,33) = 1.00, $p = 0.38$                    |  |
| <i>OPN</i>         | 8.35±1.33         | 4.07±0.54        | 0.18±0.37        | F(2,34) = 2.05, $p = 0.15$                    |  |
| <i>LHb</i>         | <b>18.45±2.13</b> | <b>8.68±1.82</b> | <b>0.03±0.34</b> | <b>F(2,33) = 4.60, <math>p = 0.02</math></b>  |  |
| <i>MHb</i>         | <b>2.86±0.55</b>  | <b>2.27±0.05</b> | <b>0.61±0.40</b> | <b>F(2,34) = 3.82, <math>p = 0.03</math></b>  |  |
| <i>SC</i>          | 8.57±1.40         | 2.55±0.84        | 1.57±0.29        | F(2,33) = 0.85, $p = 0.44$                    |  |

## Supplemental Material

Supplemental Table 1. Statistical Analysis of cFOS Activation during the Light Phase.

|              | <b>Region</b> | <b>ME(Lighting)</b>                       | <b>ME(Time)</b>                           | <b>I(Lighting x Time)</b>                 |
|--------------|---------------|-------------------------------------------|-------------------------------------------|-------------------------------------------|
| a) Grass Rat | dLGN          | F(1,20)=6.46<br><i>p</i> = <b>0.019*</b>  | F(1,20)=5.66<br><i>p</i> = <b>0.027*</b>  | F(1,20)=1.179<br><i>p</i> =0.291          |
|              | IGL           | F(1,20)=4.22<br><i>p</i> = <b>0.053#</b>  | F(1,20)=0.46<br><i>p</i> =0.507           | F(1,20)=1.17<br><i>p</i> =0.289           |
|              | vLGN          | F(1,20)=0.97<br><i>p</i> =0.338           | F(1,20)=2.55<br><i>p</i> =0.126           | F(1,20)=0.40<br><i>p</i> =0.536           |
|              | OPN           | F(1,20)=3.21<br><i>p</i> =0.089           | F(1,20)=0.003<br><i>p</i> =0.960          | F(1,20)=7.673<br><i>p</i> = <b>0.012*</b> |
|              | SC            | F(1,20)=17.61<br><i>p</i> < <b>0.001*</b> | F(1,20)=3.197<br><i>p</i> =0.090          | F(1,20)=1.36<br><i>p</i> =0.257           |
|              | LHb           | F(1,20)=2.19<br><i>p</i> =0.154           | F(1,20)=9.32<br><i>p</i> < <b>0.001*</b>  | F(1,20)=2.36<br><i>p</i> =0.140           |
|              | MHb           | F(1,20)=0.15<br><i>p</i> =0.707           | F(1,20)=3.36<br><i>p</i> =0.082           | F(1,20)=0.20<br><i>p</i> =0.658           |
|              | b) SD Rat     | dLGN                                      | F(1,16)=10.84<br><i>p</i> = <b>0.005*</b> | F(1,16)=6.40<br><i>p</i> = <b>0.022*</b>  |
| IGL          |               | F(1,16)=54.57<br><i>p</i> < <b>0.001*</b> | F(1,16)=0.17<br><i>p</i> =0.688           | F(1,16)=1.69<br><i>p</i> =0.212           |
| vLGN         |               | F(1,16)=0.143<br><i>p</i> =0.710          | F(1,16)=1.581<br><i>p</i> =0.227          | F(1,16)=2.32<br><i>p</i> =0.147           |
| OPN          |               | F(1,15)=17.23<br><i>p</i> = <b>0.001*</b> | F(1,15)=0.35<br><i>p</i> =0.562           | F(1,15)=0.427<br><i>p</i> =0.523          |
| SC           |               | F(1,15)=0.09<br><i>p</i> =0.770           | F(1,15)=5.02<br><i>p</i> = <b>0.041*</b>  | F(1,15)=2.27<br><i>p</i> =0.153           |
| LHb          |               | F(1,16)=0.31<br><i>p</i> =0.588           | F(1,16)=1.99<br><i>p</i> =0.178           | F(1,16)=0.83<br><i>p</i> =0.375           |
| MHb          |               | F(1,16)=0.23<br><i>p</i> =0.640           | F(1,16)=2.35<br><i>p</i> =0.145           | F(1,16)=1.75<br><i>p</i> =0.205           |

\* indicates significant differences with  $p < 0.05$ , # indicates a trend toward significance.

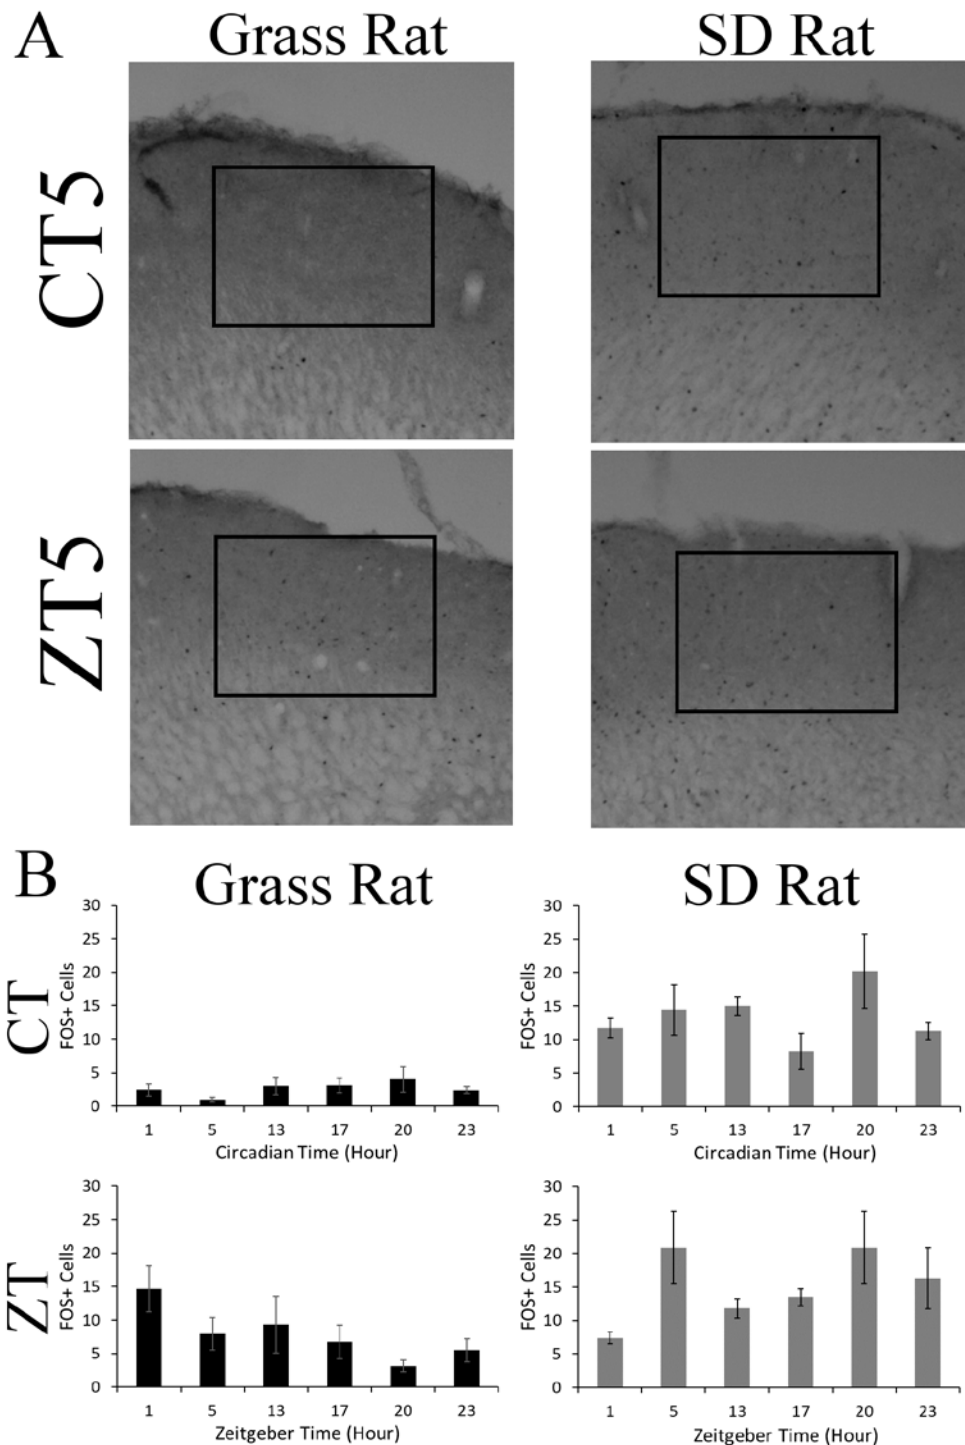

Supplemental Figure 1. cFOS activation in the superior colliculus. In SD rats expression levels are present at equal levels for both CT5 and ZT5 (A, right panel). In contrast, in grass rats, levels are low at CT5 but are increased in ZT5 (A, left panel). Examination of DD (B, top panel) and 12:12 LD conditions (B, bottom panel) do not show significant rhythms across the day for either species.
